# Supplementary material for: Collagen‐Targeted Peptides for Molecular Imaging of Diffuse Cardiac Fibrosis
Source: PubMed Central journal article supplement — J Am Heart Assoc. 2021 Sep 13;10(18):e022139. doi: 10.1161/JAHA.121.022139 (PMC8649514; doi:10.1161/jaha.121.022139), 2021-09-13
Supplement: JAH3-10-e022139-s002.pdf [file JAH3-10-e022139-s002.pdf]

# **Supplemental Material**

## Data S1.

### Supplemental Methods

#### Detailed Methods for Peptides Synthesis and Purification

**General Synthesis and Instrumentation.** Unless otherwise stated, all reagents were purchased from commercial sources and used without further purification. ESI-MS spectra were recorded on Thermo Fisher OrbiTRAP infusion mass spectrometer. HPLC purification and analysis were performed on an Agilent 1100 series using solvent A = 0.1 % TFA in MilliQ water and solvent B = 0.1% TFA in CH<sub>3</sub>CN. For analytical HPLC the purity of the peptides was tested by using a Hypersil BDS C18 analytical HPLC column (4.6 × 150 mm, 5 μm) at a flow rate of 1 mL/min (Method: 0-100% buffer B to A over 25 min,  $\lambda_{abs} = 254$  and 280 nm). For preparative HPLC a Phenomenex Luna® 5 μm C18(2) 100 Å, LC Column 250 x 21 mm at a flow rate of 5-8 mL/min was used.

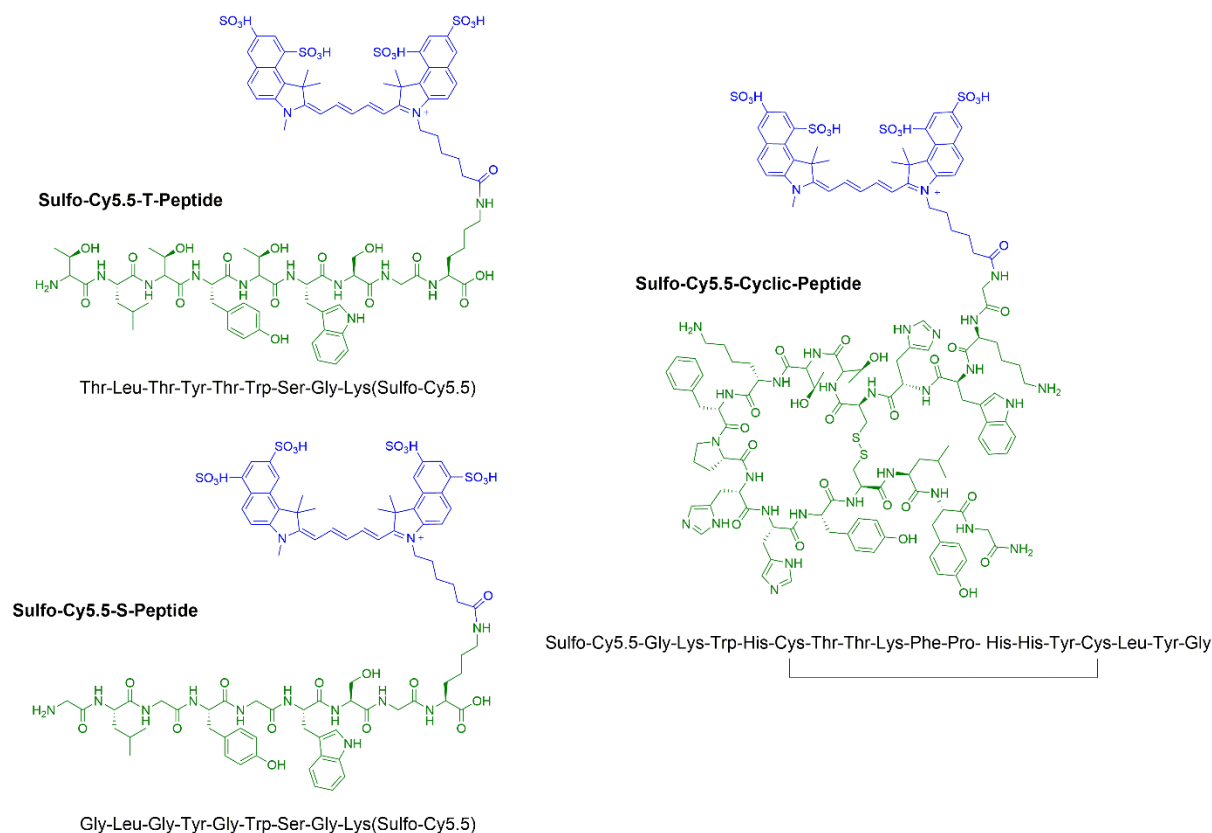

Chemical Structures of Cy5.5-conjugated peptides (main manuscript Fig. 1)

**Synthesis of Cy5.5-T-Peptide.** Linear Fmoc-NH-T-Peptide with sequence [Fmoc-Thr(*t*Bu)-Leu-Thr(*t*Bu)-Tyr(*t*Bu)-Thr(*t*Bu)-Trp(Boc)-Ser(*t*Bu)-Gly-Lys(*t*Boc)-OH] were prepared using a CEM Liberty Blue™ automated microwave peptide synthesizer. Fmoc-Lys(*t*Boc)-OH was preloaded on wang resin and each coupling cycle involved HATU (1 equiv.) and DIPEA (5 equiv.), followed by deprotection of Fmoc group using 20% piperidine in DMF, but no final deprotection of the N-terminal Fmoc group. The resin cleavage was performed using a solution of triisopropylsilane (2.5%), distilled water (2.5%) and 3,6-dioxa-1,8-octanedithiol (2.5%) in TFA (10 mL) with gentle shaking for 2 h at RT. The resin was filtered, and the filtrate was concentrated under a stream of N<sub>2</sub>, then ice-cold diethyl ether (40 mL) was added to precipitate the peptide which was collected after centrifugation. The crude peptide Fmoc-NH-T-Peptide was purified by HPLC (Phenomenex Luna® 5 μm C18(2) 100 Å, LC column 250 x 21 mm using 0.1% TFA in MilliQ water and acetonitrile) and the identity of the peptides were confirmed by ESI-MS. The peptide (6 mg, 4.69 μmol) and Sulfo-Cy5.5-NHS ester (11 mg, 9.39 μmol) were dissolved in DMF (1 mL) then DIEA (4.10 μl) was added. The solution was agitated at room temperature for 5 hrs then ice-cold diethyl ether (40 mL) was added to precipitate the peptide which was collected after centrifugation. The precipitate was treated with 20% piperidine in DMF (1 mL) for 10 min then ice-cold diethyl ether (40 mL) was added to precipitate the peptide which was collected after centrifugation and purified by HPLC (2.3 mg, yield 30%). Analytical HPLC was performed and the purity of the isolated peptides found to be >95%. The identity of the peptide was confirmed by ESI-MS. ESI-MS: Cy5.5-T-Peptide (-ve ion) [M - 2H]<sup>-2</sup>,  $m/z = 969.3320$  (experimental), calculated for [C<sub>89</sub>H<sub>114</sub>N<sub>13</sub>O<sub>28</sub>S<sub>4</sub>]<sup>-2</sup>:  $m/z = 969.3316$

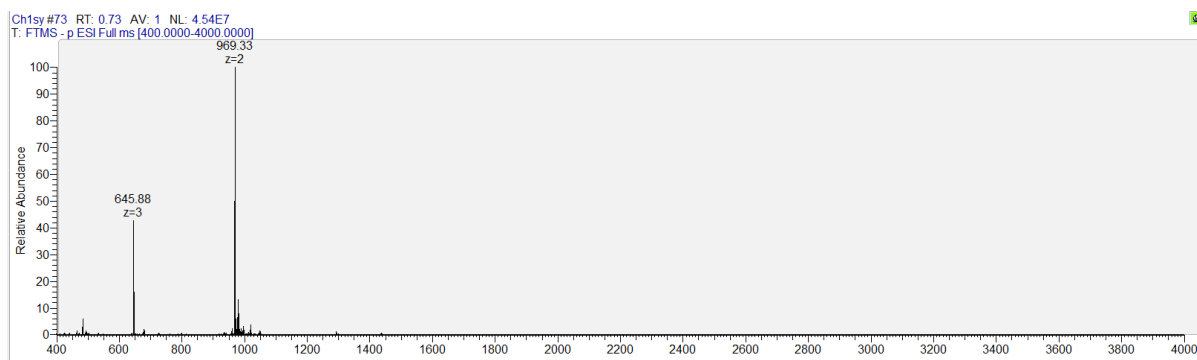

*ESI-MS spectrum for Cy5.5-T-peptide*

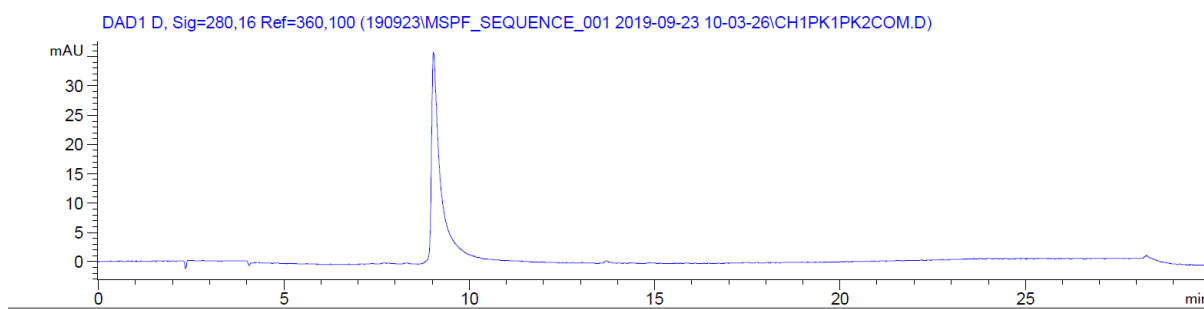

Analytical HPLC chromatogram for Cy5.5-T-peptide (Method: UV Abs at 280 nm, gradient 0% B in A – 100% over 20 min (A = 0.1 % TFA in MilliQ, B = 0.1 % TFA in MeCN))

**Synthesis of Cy5.5-S-Peptide.** Linear Fmoc-NH-S-Peptide with the sequence [Fmoc-Gly-Leu-Gly-Tyr(*t*Bu)-Gly-Trp(Boc)-Ser(*t*Bu)-Gly-Lys(*t*Boc)-OH] was prepared using the same method described above for the Fmoc-NH-T-Peptide, followed by the same procedure for Cy5.5 conjugation and purification (3 mg, yield 38%). Analytical HPLC was performed and the purity of the isolated peptides found to be >95%. The identity of the peptide was confirmed by ESI-MS. ESI-MS: Cy5.5-S-Peptide (-ve ion)  $[M - 2H]^{-2}$ ,  $m/z = 903.2908$  (experimental), calculated for  $[C_{83}H_{102}N_{13}O_{25}S_4]^{-2}$ :  $m/z = 903.2923$

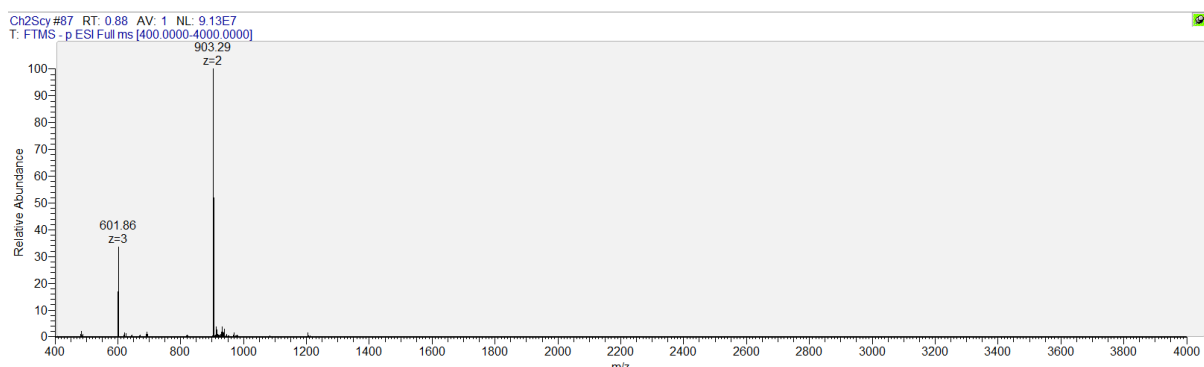

ESI-MS spectrum for Cy5.5-S-peptide

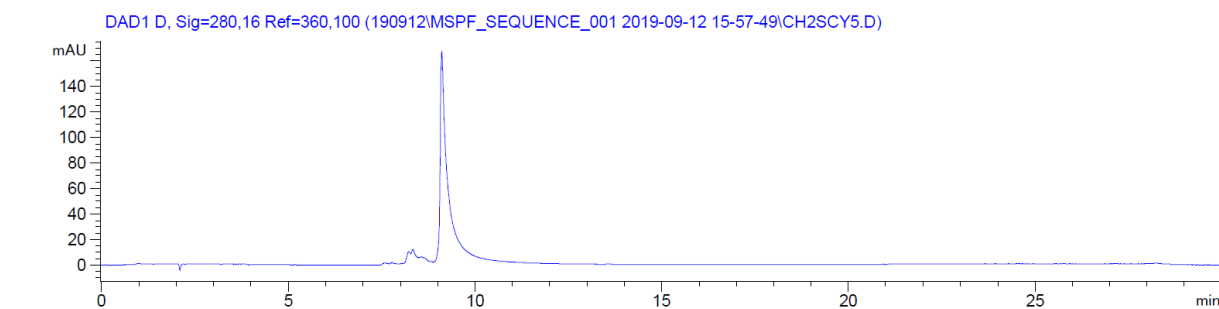

Analytical HPLC chromatogram for Cy5.5-S-peptide (Method: UV Abs at 280 nm, gradient 0% B in A – 100% over 20 min (A = 0.1 % TFA in MilliQ, B = 0.1 % TFA in MeCN))

**Synthesis of Cy5.5-Cyclic-Peptide.** Fmoc-Gly-OH was preloaded on Rink amide resin, then the linear sequence [Fmoc-Gly-Lys(Boc)-Trp(Boc)-His(trt)-Cys(Acm)-Thr(*t*Bu)-Thr(*t*Bu)-Lys(Boc)-Phe-Pro-His(trt)-His(trt)-Tyr(*t*Bu)-Cys(Acm)-Leu-Tyr(*t*Bu)-Gly-OH] was prepared using the same method described for Fmoc-NH-T-Peptide. The resin-bound linear peptide was then cyclized using iodine (1 mg/mg of resin) in DMF (20 mL) for 4 hours. After cyclization, the N-terminus Fmoc group was removed by 20% piperidine in DMF (1 mL) for 10 min. Ice-cold diethyl ether (40 mL) was then added to precipitate the peptide, which was collected after centrifugation. Resin cleavage was then performed using a solution of triisopropylsilane (2.5%), distilled water (2.5%), Phenol (2.5%), DMB (2.5%) and 3,6-dioxa-1,8-octanedithiol (2.5%) in TFA (10 mL) with gentle shaking for 2 h at RT. The resin was filtered and the filtrate concentrated under a stream of N<sub>2</sub>. Ice-cold diethyl ether (40 mL) was then added to precipitate the peptide, which was collected by centrifugation. The crude peptide Fmoc-NH-Cyclic-Lys(ivDDe)-Peptide was purified by HPLC (Phenomenex Luna® 5 µm C18(2) 100 Å, LC column 250 x 21 mm using 0.1% TFA in MilliQ water and acetonitrile) and its identity confirmed by ESI-MS. The peptide (4 mg, 1.9 µmol) and Sulfo-Cy5.5-NHS ester (4.4 mg, 3.85 µmol) were dissolved in DMF (1 mL) and DIEA (4.0 µl) was added. The solution was agitated at room temperature for 5 hrs. Ice-cold diethyl ether (40 mL) was then added to precipitate the peptide, which was centrifuged and collected. The precipitate was treated with 20% piperidine in DMF (1 mL) for 10 min, followed by addition of ice-cold diethyl ether (40 mL) to induce peptide precipitation. After centrifugation, the peptide pellet was treated with 2% hydrazine in DMF to remove the ivDDe protecting groups from Lys residues, followed by final HPLC purification (1.2 mg, yield 20%). ESI-MS: Cy5.5-Cyclic-Peptide (+ve ion) [M + 2H]<sup>2+</sup>, *m/z* = 1480.0527 (experimental), calculated for [C<sub>137</sub>H<sub>173</sub>N<sub>29</sub>O<sub>34</sub>S<sub>6</sub>]<sup>2+</sup>: *m/z* = 1481.0505

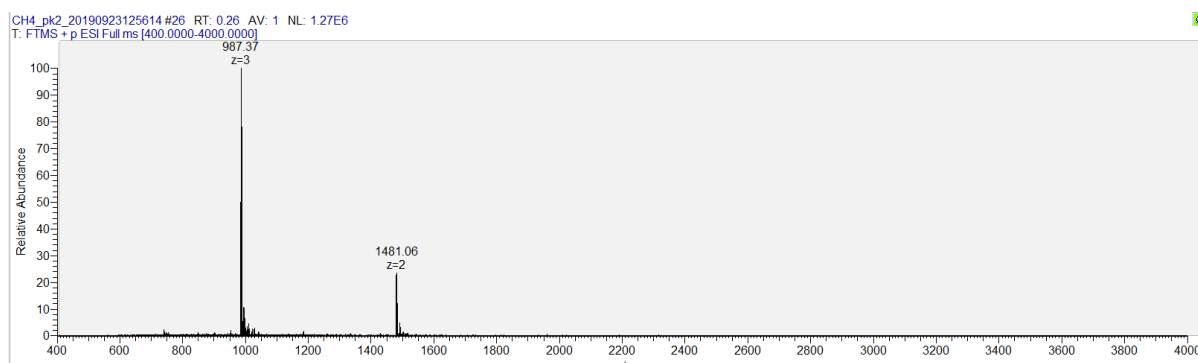

*ESI-MS spectrum for Cy5.5-Cyclic-peptide*

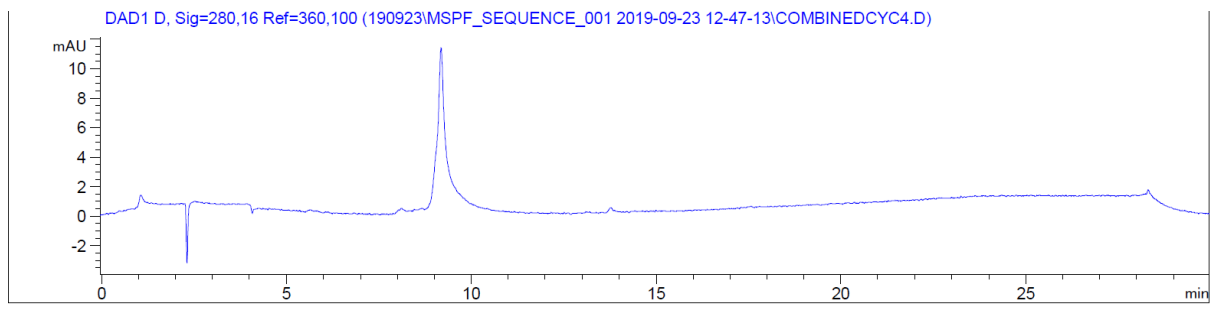

*Analytical HPLC chromatogram for Cy5.5-Cyclic-peptide (Method: UV Abs at 280 nm, gradient 0% B in A – 100% over 20 min (A = 0.1 % TFA in MilliQ, B = 0.1 % TFA in MeCN))*

**Figure S1. Characterisation of fibrosis and collagen types in human cardiac specimens from an ischaemic heart disease (IHD) patient and a healthy donor.**

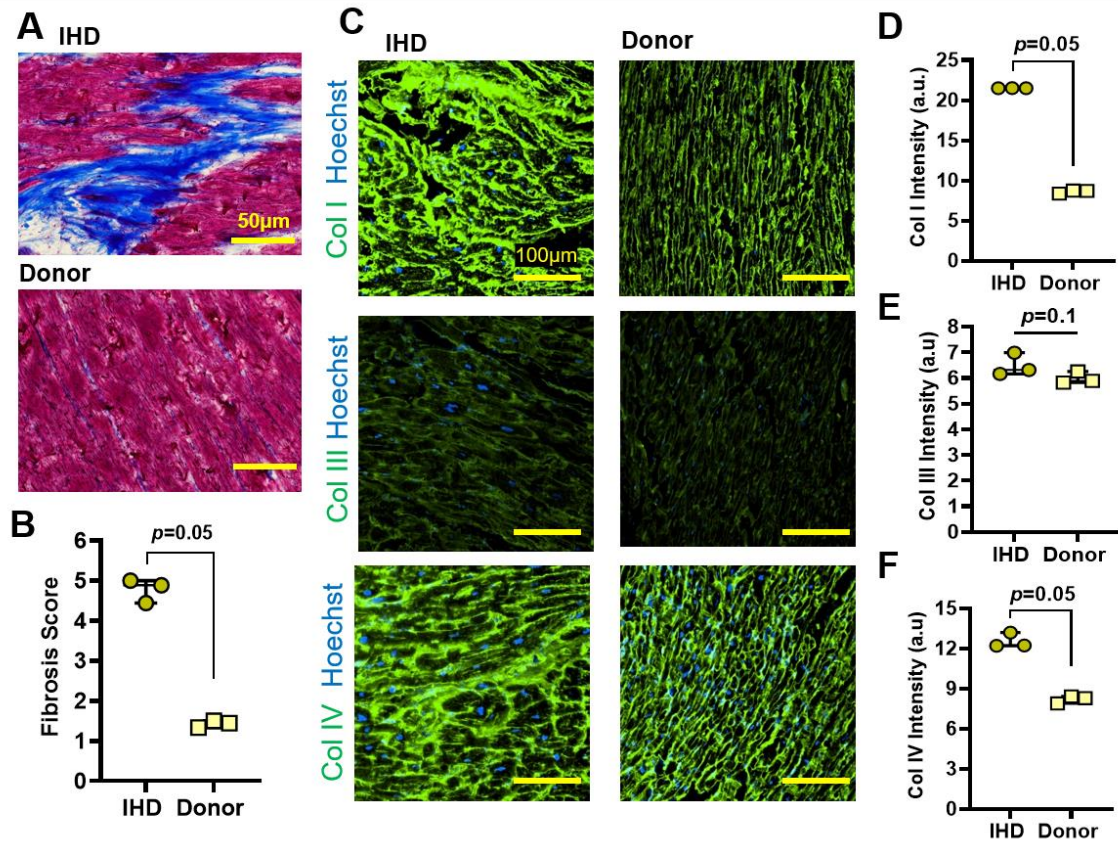

**(A, B)** Representative images **(A)** and quantification of cardiac fibrosis (percentage of the blue areas; **B**) based on Masson's trichrome staining of IHD and healthy donor heart tissues. **(C-F)** Representative immunohistochemical images of collagen types **(C)**, as well as quantification of the mean fluorescence intensities of collagen I **(D)**, collagen III **(E)** and collagen IV **(F)** in IHD and healthy donor cardiac specimens. Median  $\pm$  Interquartile range.  $n=1$  sample per condition, averaging 3 tissue planes per sample. Mann-Whitney test (one-tailed). Scale bars = 100 $\mu$ m.

**Figure S2. Characterisation of T- and S-peptide uptake in whole organs of transgenic (Tg) and non-transgenic (Ntg)  $\beta$ 2-AR mice.**

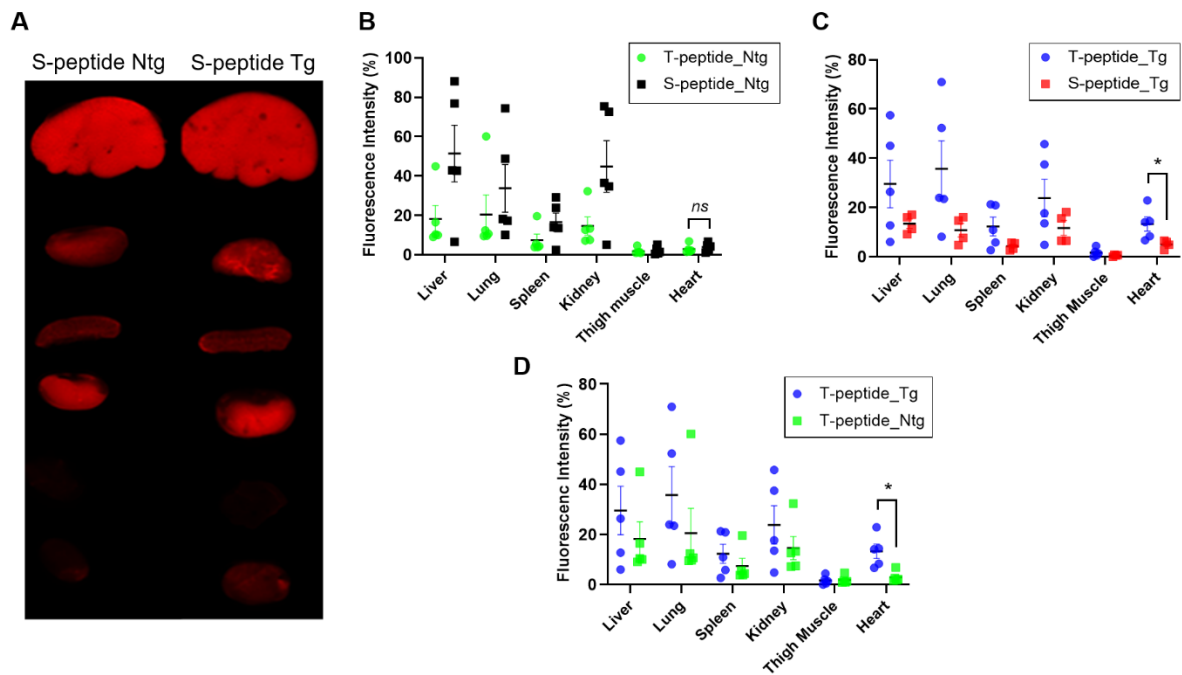

Representative images (**A**) and quantitative comparisons between the accumulation profiles of Cy5.5-T- and S-peptides in Ntg (**B**) and Tg animals (**C**), highlighting a trend for specific accumulation of the T-peptide in several organs, including the heart, in the latter. (**D**) Comparison of T-peptide uptake in fibrotic (Tg) vs. healthy (Ntg) mice demonstrating a significant difference in T-peptide uptake only in the heart, in line with the cardiac-specific fibrotic phenotype of the  $\beta$ 2-AR model. Detailed analyses of the cardiac uptake are described in **Fig. 2**. Mean $\pm$ SEM. n=5 per group. Multiple Mann-Whitney tests with Holm-Sidak post-hoc ( $\alpha=0.1$ ).



**Figure S3. T-peptide enhancement of  $\beta$ 2-AR transgenic mouse hearts at 7-months of age.**

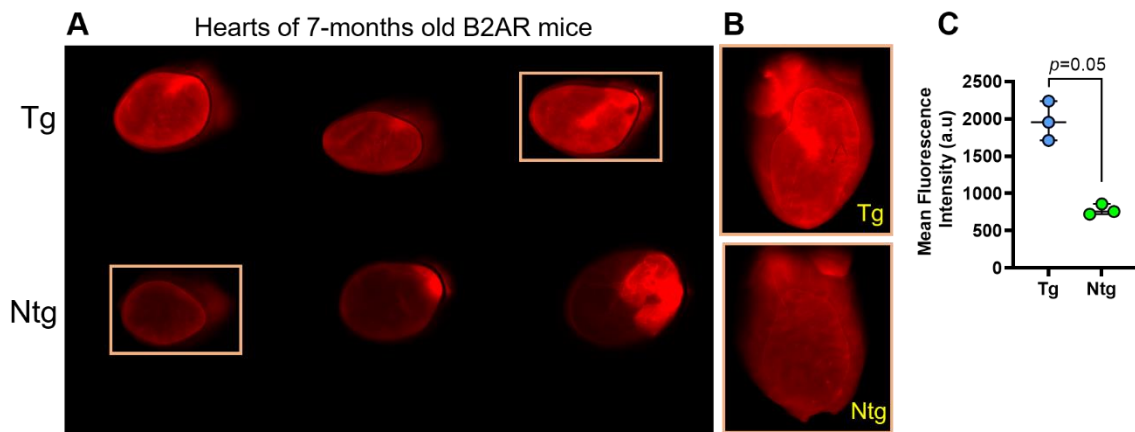

**(A, B)** *Ex vivo* Odyssey images (all hearts in **A** and higher resolution scans of the framed hearts in **B**) showing a Cy5.5-T-peptide ventricular enhancement of transgenic vs. non-transgenic  $\beta$ 2-AR mouse hearts at 7-months of age, when they develop an intermediate cardiac fibrosis. **(C)** Quantification of the ventricular T-peptide uptake. Median + Interquartile range. n=3 per group. Mann-Whitney test (one-tailed).

Figure S4. Standard curves of Cy5.5-T- and S-peptides comparing their brightness on a molar basis.

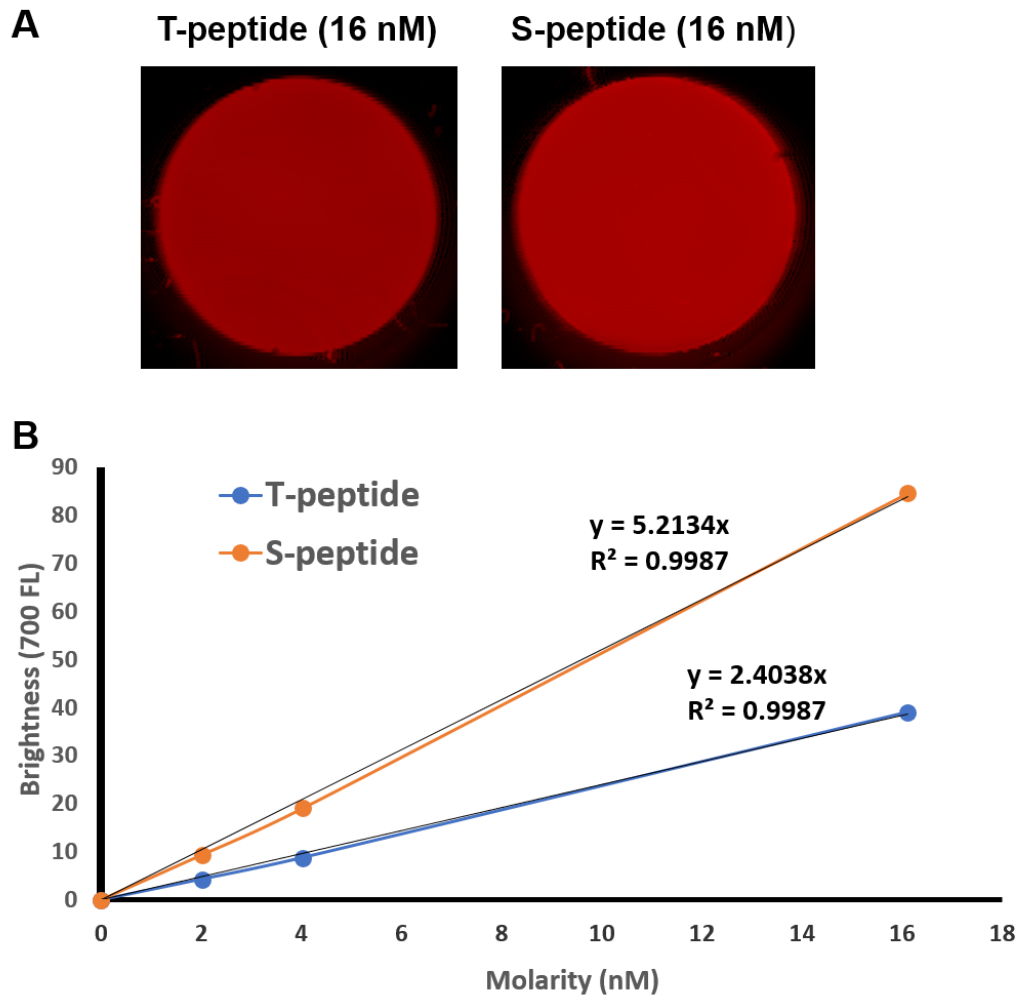

(A) Representative Odyssey scans of 96-wells containing equimolar concentrations (16 nM) of sulfo-Cy5.5-conjugated T- and S-peptides. An increased brightness of the S-peptide is observed. (B) Standard curves and linear regressions comparing the two peptides on an equimolar basis. The slope ratio S/T is  $5.2134/2.4038 = 2.169$ , meaning that the S-peptide is 2.169-fold brighter than the T-peptide.

**Figure S5. Blood clearance and toxicity profiles of T- and Cyclic-peptides.**

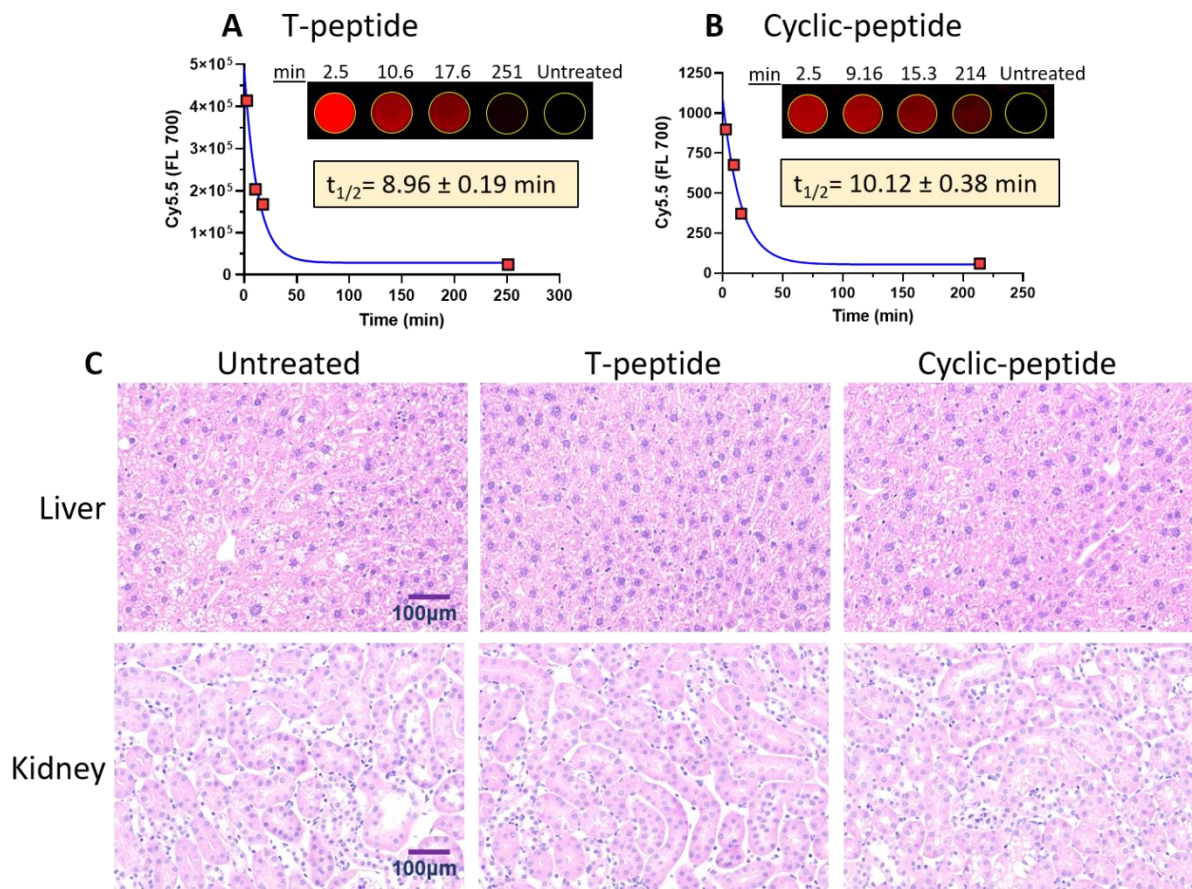

(A, B) Representative Odyssey blood scans and the corresponding blood clearance curves, as well as the calculated half-lives ( $t_{1/2}$ ) of Cy5.5-conjugated T-peptide (A) and cyclic-peptide (B) within 4 h after intravenous peptide administration (0.5 mg/kg) to non-transgenic  $\beta 2$ -AR mice at 8-9 months of age. (C) Representative images of H&E-stained livers (top panels) and kidneys (bottom panels) from untreated and peptide-treated mice (the same animals as in A & B) 24 h post-peptide administration. No cell death, abnormal morphology or tissue destruction are observed following peptide injections, despite the high exposure of these organs to the peptides.  $n = 2$ .  $t_{1/2}$  in A & B is calculated by one-phase exponential decay regression. Scale bars = 100µm.

**Figure S6. Elastin and fibrosis staining in the lungs and kidneys of aged  $\beta$ 2-AR and young wild-type mice.**

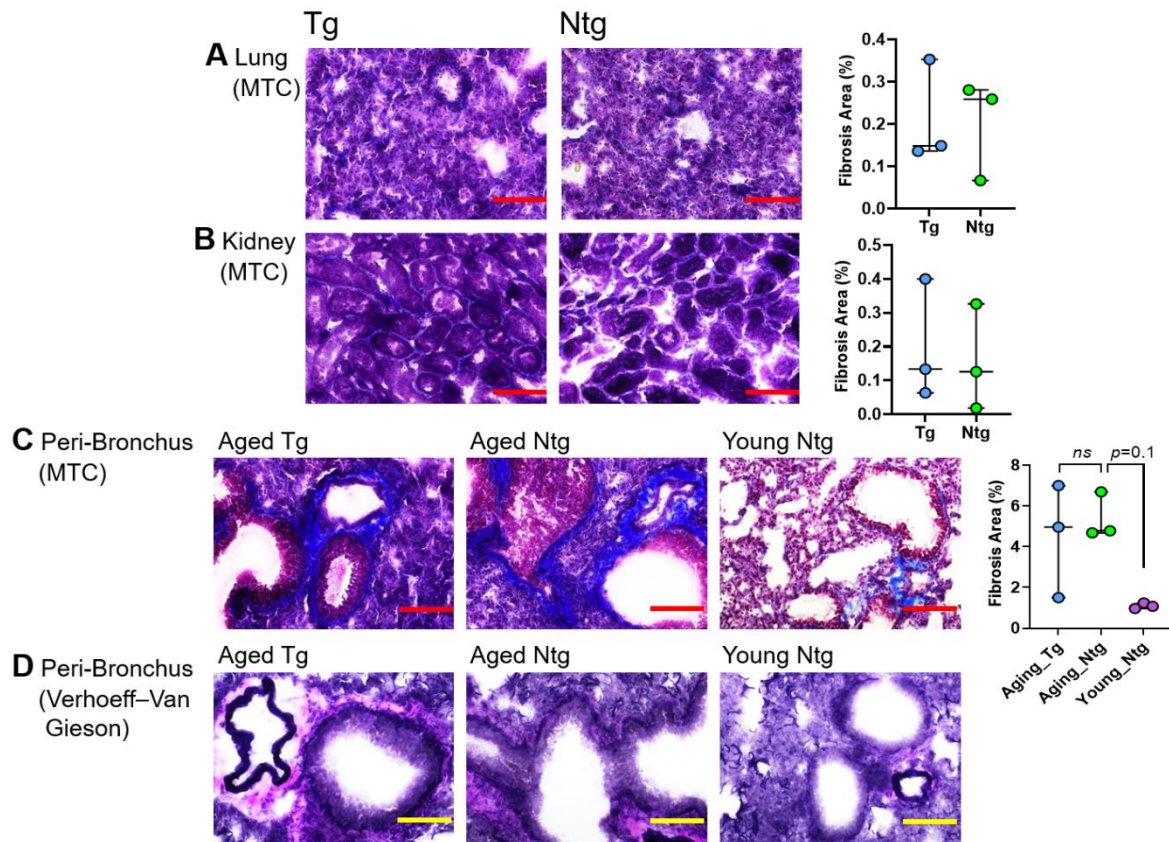

(**A, B**) Representative Masson’s trichrome (MTC) staining of lungs (**A**) and kidneys (**B**) of fibrotic (transgenic; Tg; left) and normal (non-transgenic; Ntg; right)  $\beta$ 2-AR mice. Quantification of the renal and lung fibrotic areas demonstrates no differences between the genotypes (**A, B**; right panels). (**C, D**) Representative MTC (**C**) and Verhoeff–Van Gieson elastin staining (**D**) of peri-bronchial fibrosis in lungs from fibrotic (Tg) and non-fibrotic (Ntg)  $\beta$ 2-AR mice, as well as young wild-type C57Bl/6 mice at 5 weeks of age. No quantitative differences in peri-bronchial fibrosis between the  $\beta$ 2-AR genotypes is observed (**C**; right). Median  $\pm$  Interquartile range.  $n=3$ . In **A** & **B** Mann-Whitney test (one-tailed); In **C** Kruskal-Wallis test with Dunn’s post-hoc of preselected pairs of columns ( $\alpha=0.1$ ). Scale bars = 100 $\mu$ m.

## **Supplemental Video Legends:**

**Confocal microscope reconstruction videos of Cy5.5-T-peptide binding to collagen type IV in mouse and human fibrotic heart tissues.**

**Video S1. 3-D confocal microscope reconstruction video of Cy5.5-T-peptide binding (red) to collagen type IV (green) in fibrotic  $\beta$ 2-AR mouse heart.** The T-peptide was administered intravenously, while collagen IV was revealed by immunohistochemistry *ex vivo*. Nuclei are depicted in blue (Hoechst). Best viewed with Windows Media Player.

**Video S2. 3-D confocal microscope reconstruction video of Cy5.5-T-peptide binding (red) to collagen type IV (green) in cardiac human sample from patient with an ischaemic heart disease (IHD).** Nuclei are depicted in blue (Hoechst). Best viewed with Windows Media Player.
